# Supplementary material for: Exploration of the Temperature Sensing Ability of La2MgTiO6:Er3+ Double Perovskites Using Thermally Coupled and Uncoupled Energy Levels
Source: MDPI journal article supplement (doi:10.3390/ma14195557), 2021-09-24
Supplement: s1 [file s1]

# Supplementary Materials

## Exploration of the Temperature Sensing Ability of $\text{La}_2\text{MgTiO}_6:\text{Er}^{3+}$ Double Perovskites Using Thermally Coupled and Uncoupled Energy Levels

Thi Hong Quan Vu, Bartosz Bondzior, Dagmara Stefańska and Przemysław J. Deren \*  
 Institute of Low Temperature and Structure Research, Polish Academy of Sciences, Okólna2,  
 50-422 Wrocław, Poland; q.vu@intibs.pl (T.H.Q.V.); b.bondzior@intibs.pl (B.B.);  
 d.stefanska@intibs.pl (D.S.)  
 \* Correspondence: p.deren@intibs.pl

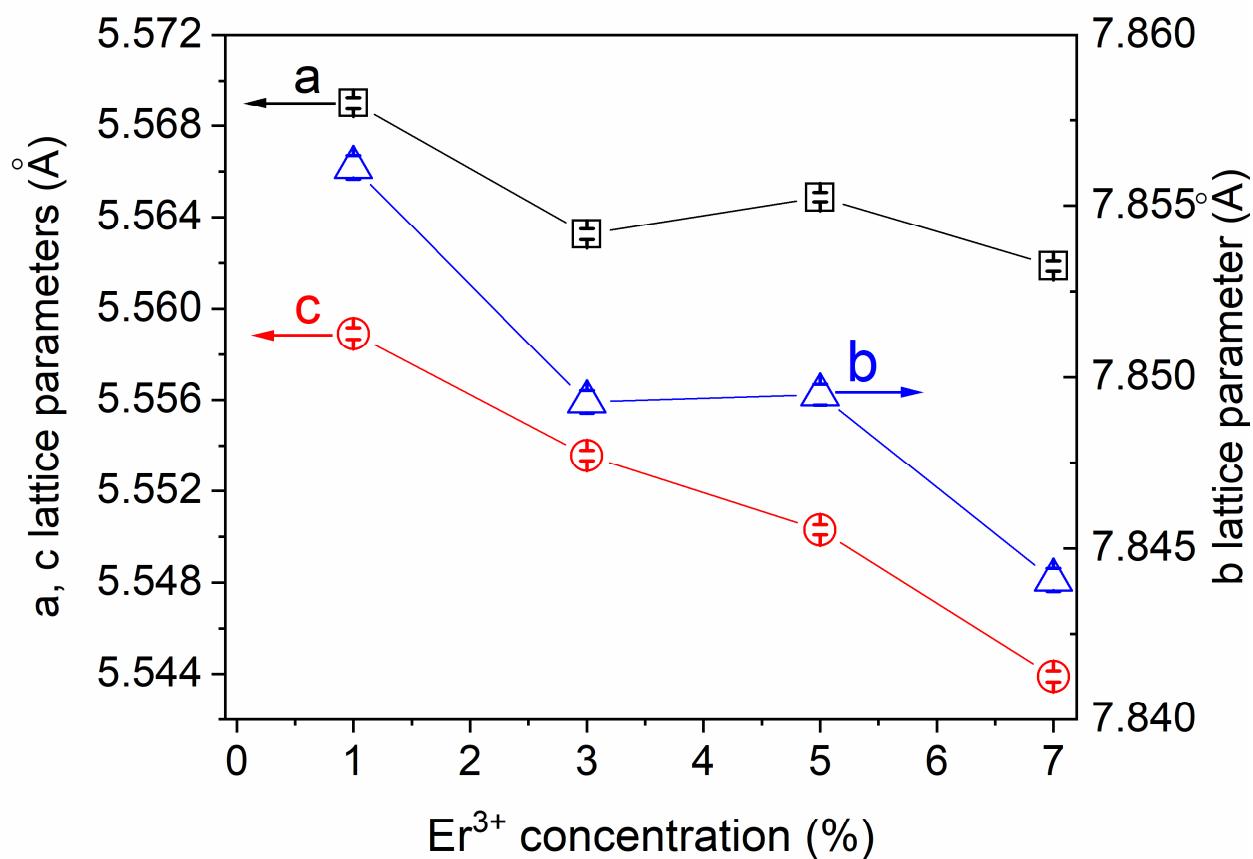

**Figure S1.** Lattice parameters (a: black squares, b: blue triangles, c: red circles) changes of  $\text{La}_2\text{MgTiO}_6: x \text{Er}^{3+}$ , ( $x = 1, 3, 5, 7 \%$ ) as a function of  $\text{Er}^{3+}$  concentration.

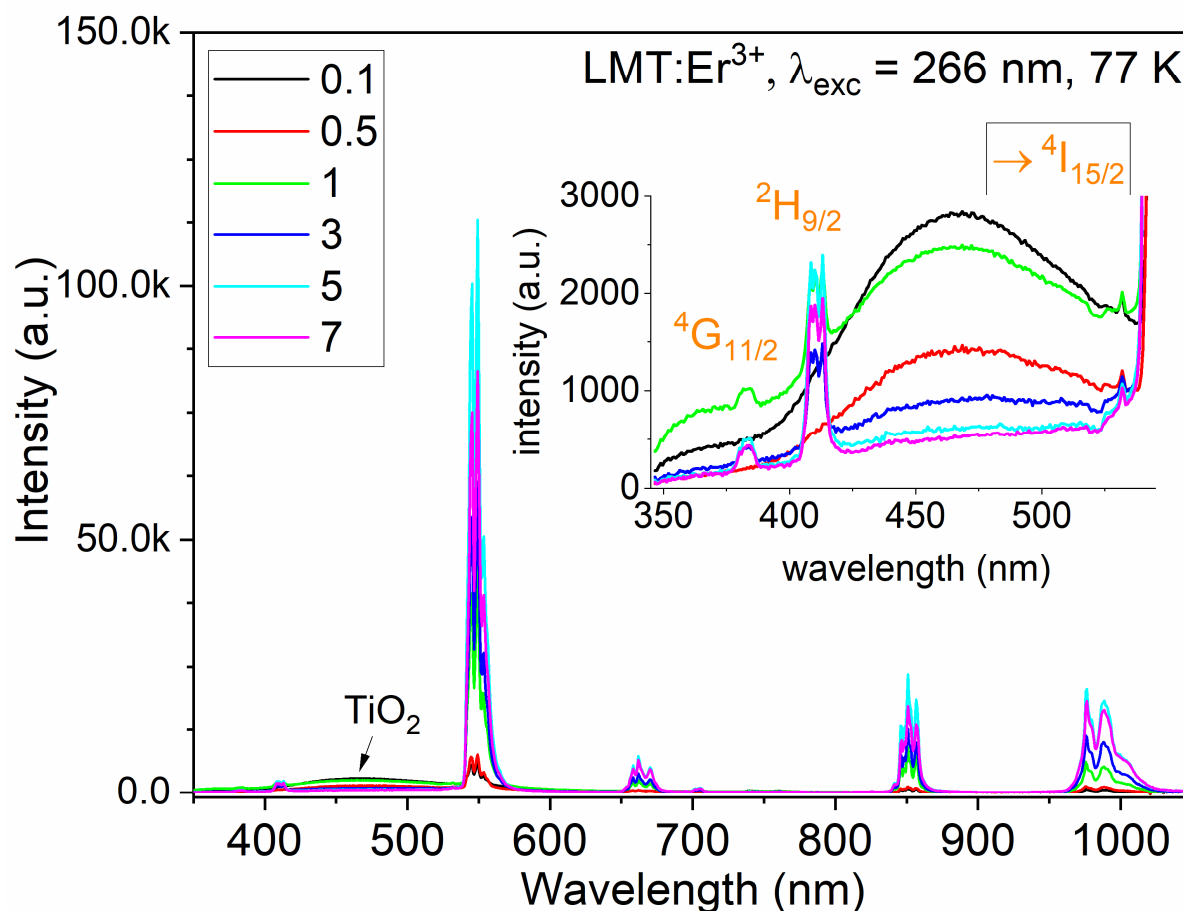

**Figure S2.** 77 K emission spectra of  $\text{La}_2\text{MgTiO}_6: x \text{Er}^{3+}$ , ( $x = 0.1, 0.5, 1, 3, 5, 7 \%$ ) recorded under 266 nm excitation.

**Table S1.** Energy levels of  $\text{Er}^{3+}$  ions in  $\text{La}_2\text{MgTiO}_6$  double perovskites obtained from the 77 K and 300 K emission spectra and the 300 K absorption spectrum\*.

| Level               | Number of levels |        | Energies ( $\text{cm}^{-1}$ )                | $\Delta E$ ( $\text{cm}^{-1}$ ) |
|---------------------|------------------|--------|----------------------------------------------|---------------------------------|
|                     | Experiment       | Theory |                                              |                                 |
| $^4\text{I}_{15/2}$ | 6                | 8      | 0, 96, 127, 139, 272, 362                    | 362                             |
| $^4\text{I}_{13/2}$ | 7                | 7      | 6460*, 6527, 6555, 6565*, 6592*, 6666, 6770* | 309                             |

|                     |   |   |                                               |     |
|---------------------|---|---|-----------------------------------------------|-----|
| $^4\text{I}_{11/2}$ | 2 | 6 | 10111*, 10242                                 | 131 |
| $^4\text{I}_{9/2}$  | 2 | 5 | 12424*, 12563*                                | 139 |
| $^4\text{F}_{9/2}$  | 5 | 5 | 14916*, 15099*, 15195, 15230*, 15300*         | 384 |
| $^4\text{S}_{3/2}$  | 2 | 2 | 18335, 18437*                                 | 102 |
| $^2\text{H}_{11/2}$ | 6 | 6 | 18965, 19066*, 19109*, 19153*, 19190*, 19246* | 281 |
| $^4\text{F}_{7/2}$  | 4 | 4 | 20325*, 20408*, 20450*, 20521*                | 196 |
| $^4\text{F}_{5/2}$  | 3 | 3 | 21930*, 22026*, 22173*                        | 243 |
| $^4\text{F}_{3/2}$  | 2 | 2 | 22447*, 22573*                                | 126 |
| $^2\text{H}_{9/2}$  | 5 | 5 | 24361*, 24438*, 24480, 24570*, 24631*         | 270 |
| $^4\text{G}_{11/2}$ | 1 | 6 | 26178*, 26316*, 26385, 26469*                 | 291 |
| $^4\text{G}_{9/2}$  | 2 | 5 | 27211*, 27322*                                | 111 |
| $^4\text{G}_{7/2}$  | 1 | 4 | 28011*                                        |     |

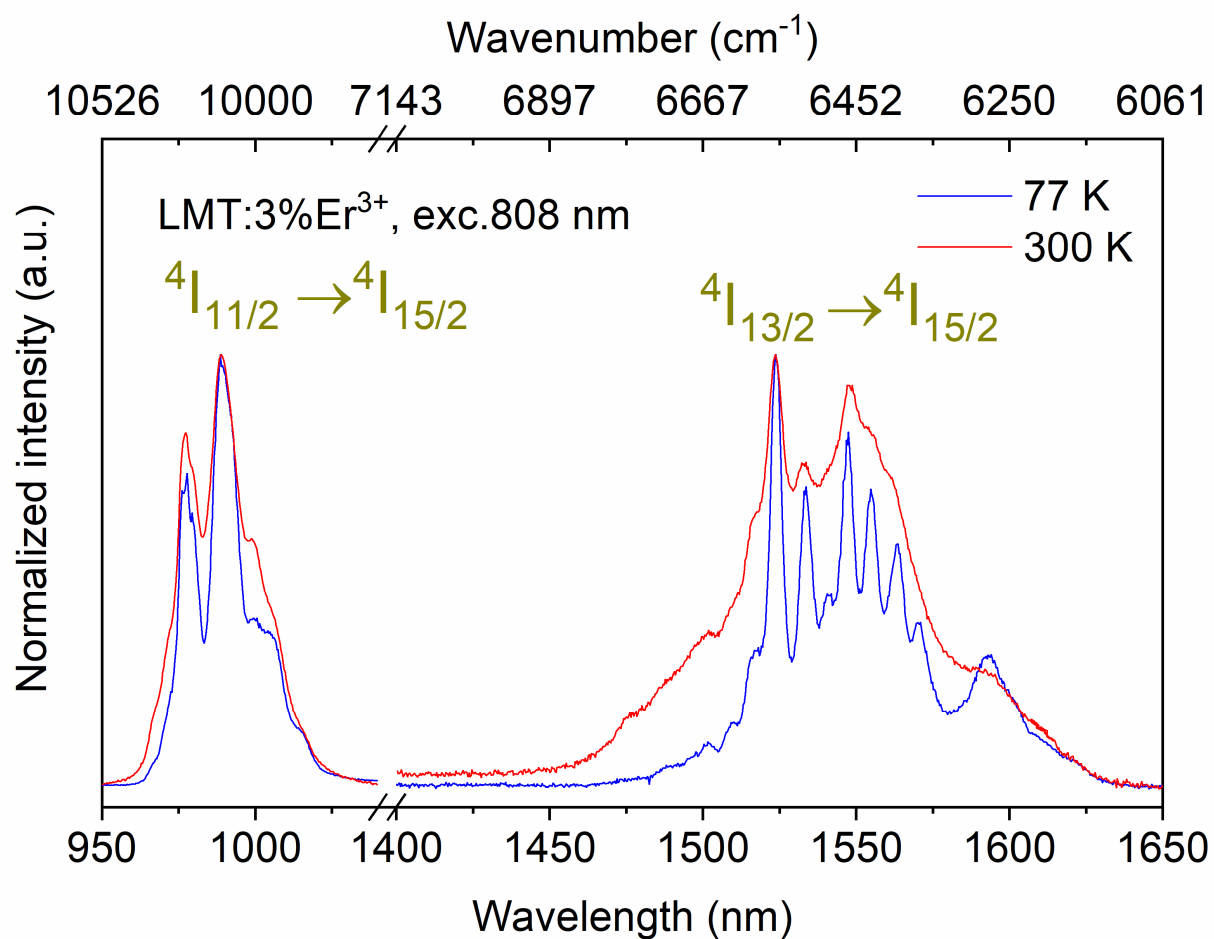

**Figure S3.** Emission spectra of La<sub>2</sub>MgTiO<sub>6</sub>: 3 % Er<sup>3+</sup> obtained in the infrared regions under 808 excitation.

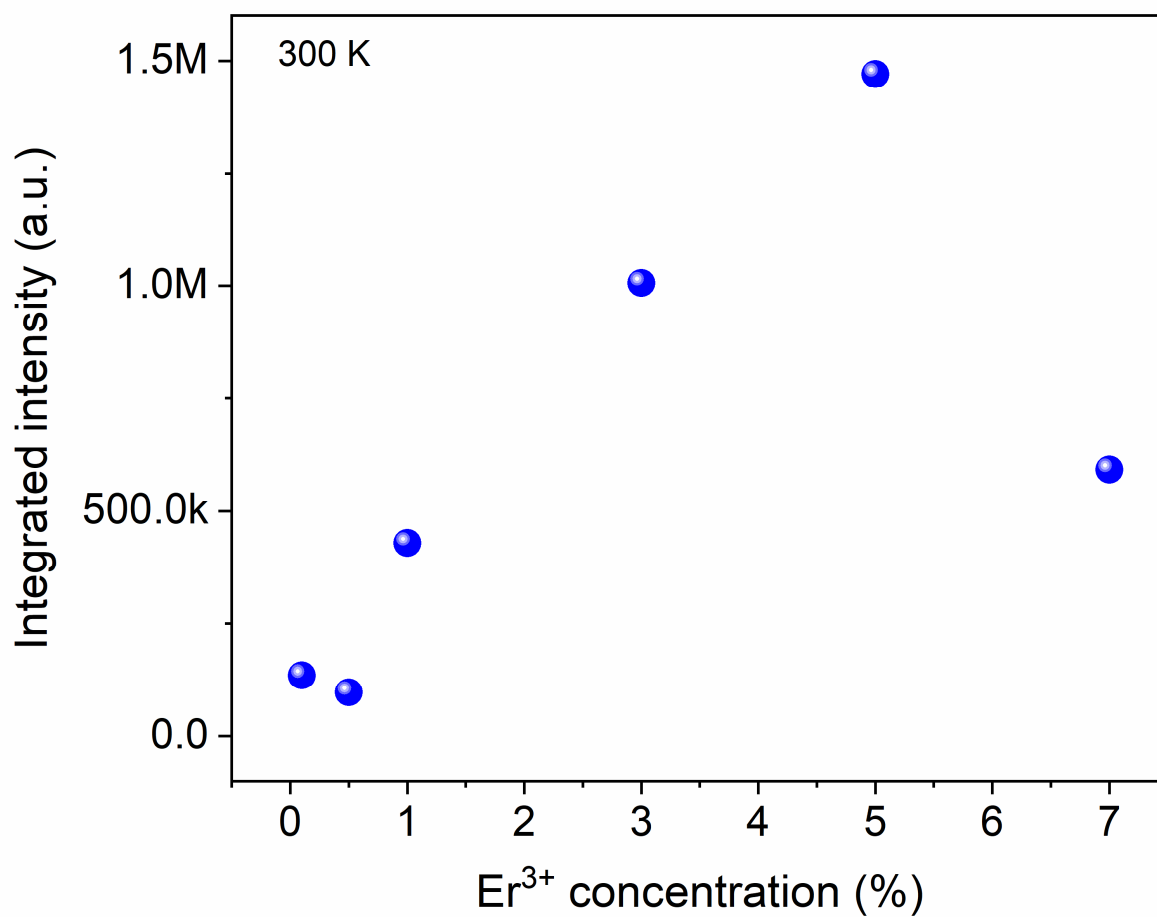

**Figure S4.** Integrated emission intensity of  $\text{La}_2\text{MgTiO}_6: x \text{Er}^{3+}$ , ( $x = 0.1, 0.5, 1, 3, 5, 7 \%$ ) recorded under 266 nm excitation at 300 K.

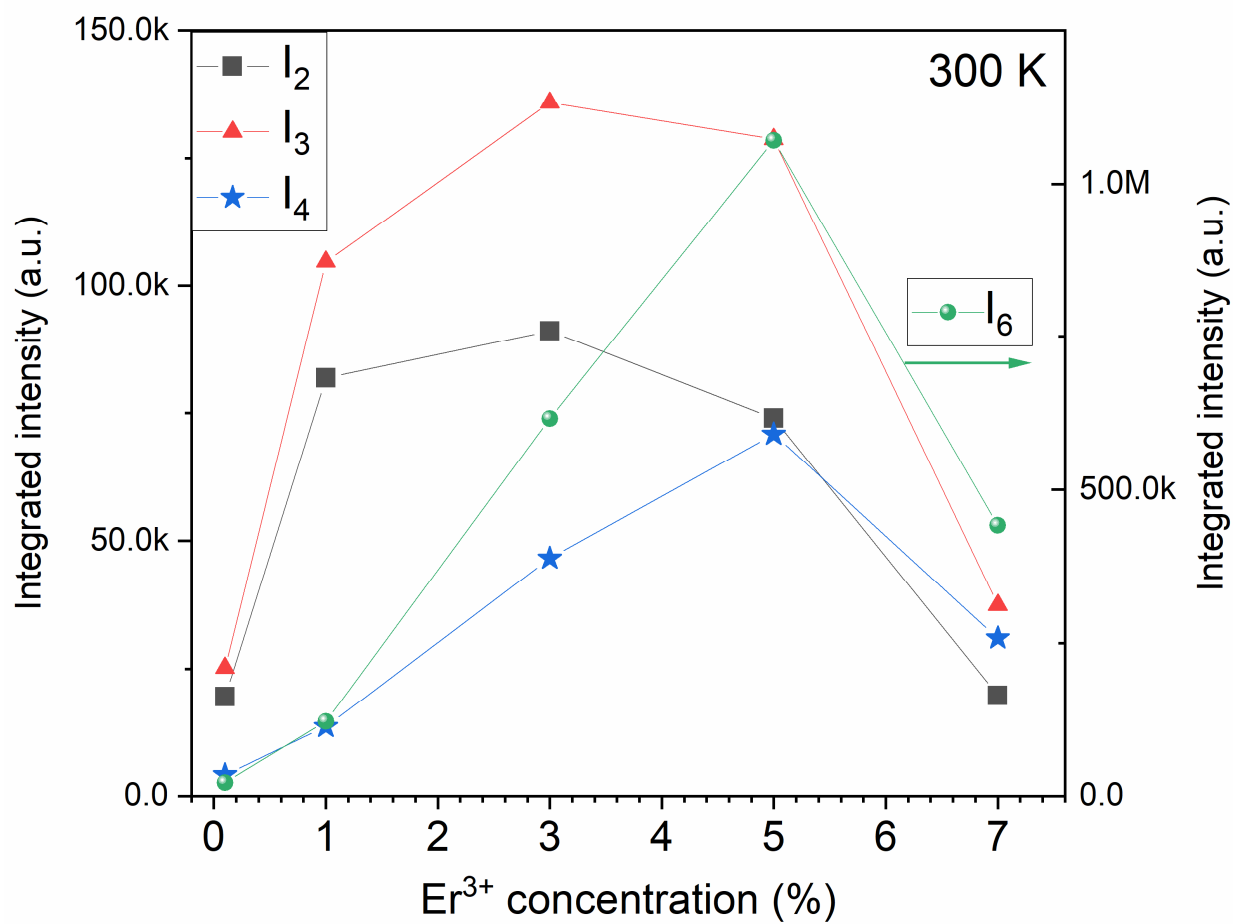

**Figure S5.** Integrated emission intensity of each level as a function of Er<sup>3+</sup> concentration at 300 K.

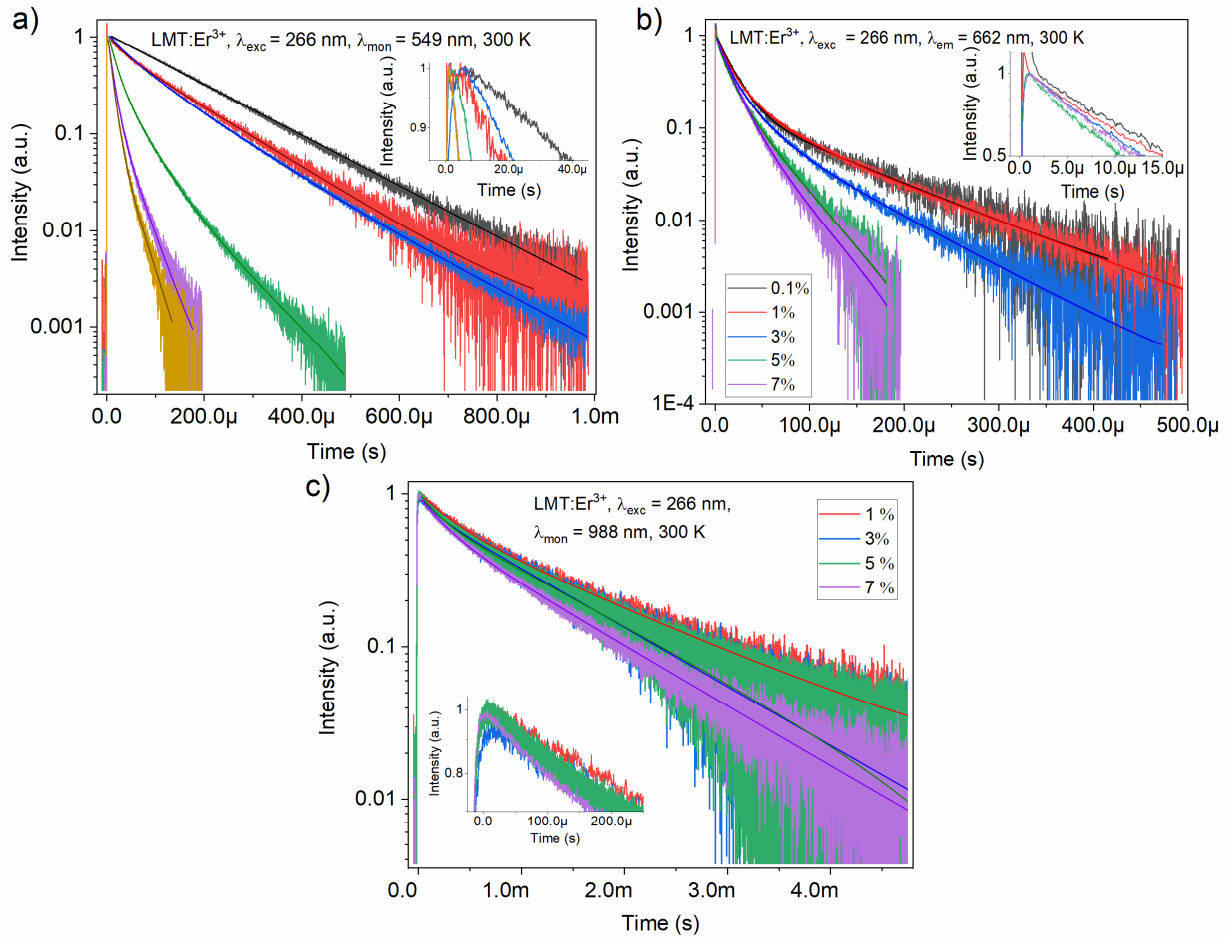

**Figure S6.** 300 K decay profiles of  $\text{La}_2\text{MgTiO}_6:\text{Er}^{3+}$  and rise time (in the inset) excited at 266 nm and monitored at 549 nm (a), at 662 nm (b), at 988 nm (c).

The 300 K decay profiles of all samples exhibited multiexponential functions determined as the following equation:

$$y = A_1 \times e^{-x/\tau_1} + A_2 \times e^{-x/\tau_2} + A_3 \times e^{-x/\tau_3} \quad (1)$$

where  $\tau_1, \tau_2, \tau_3$  are decay time constants, and  $A_1, A_2, A_3$  are the amplitudes.

The amplitude average lifetime was calculated using the below equation [1]:

$$\tau_{avg} = \frac{A_1 \times \tau_1^2 + A_2 \times \tau_2^2 + A_3 \times \tau_3^2}{A_1 \times \tau_1 + A_2 \times \tau_2 + A_3 \times \tau_3}$$

**Table S2.** Decay time of  $\text{La}_2\text{MgTiO}_6:\text{Er}^{3+}$  obtained at different monitoring wavelength corresponding to  $^4\text{S}_{3/2}$  (549 nm),  $^4\text{F}_{9/2}$  (662 nm),  $^4\text{I}_{11/2}$  (988 nm) levels and their rise time (\*) single-exponential decay for the sample  $\text{La}_2\text{MgTiO}_6: 0.1\% \text{Er}^{3+}$ .

|                       | $\lambda_{\text{em}} = 549 \text{ nm}$ |                                    | $\lambda_{\text{em}} = 662 \text{ nm}$ |                                    | $\lambda_{\text{em}} = 988 \text{ nm}$ |                                    |
|-----------------------|----------------------------------------|------------------------------------|----------------------------------------|------------------------------------|----------------------------------------|------------------------------------|
| $\text{Er}^{3+} (\%)$ | $\tau_{\text{avg}} (\mu\text{s})$      | $\tau_{\text{rise}} (\mu\text{s})$ | $\tau_{\text{avg}} (\mu\text{s})$      | $\tau_{\text{rise}} (\mu\text{s})$ | $\tau_{\text{avg}} (\mu\text{s})$      | $\tau_{\text{rise}} (\mu\text{s})$ |
| 0.1                   | 166*                                   | 1.94                               | 66.7                                   | ---                                | ---                                    | ---                                |
| 1                     | 124                                    | 1.58                               | 66.7                                   | ---                                | 1330                                   | 4.39                               |
| 3                     | 44.1                                   | 0.185                              | 43.4                                   | 0.15                               | 1090                                   | 5.9                                |
| 5                     | 18.8                                   | 0.16                               | 26.4                                   | 0.15                               | 1150                                   | 4.73                               |
| 7                     | 14.4                                   | 0.13                               | 23.4                                   | 0.16                               | 1010                                   | 3.64                               |



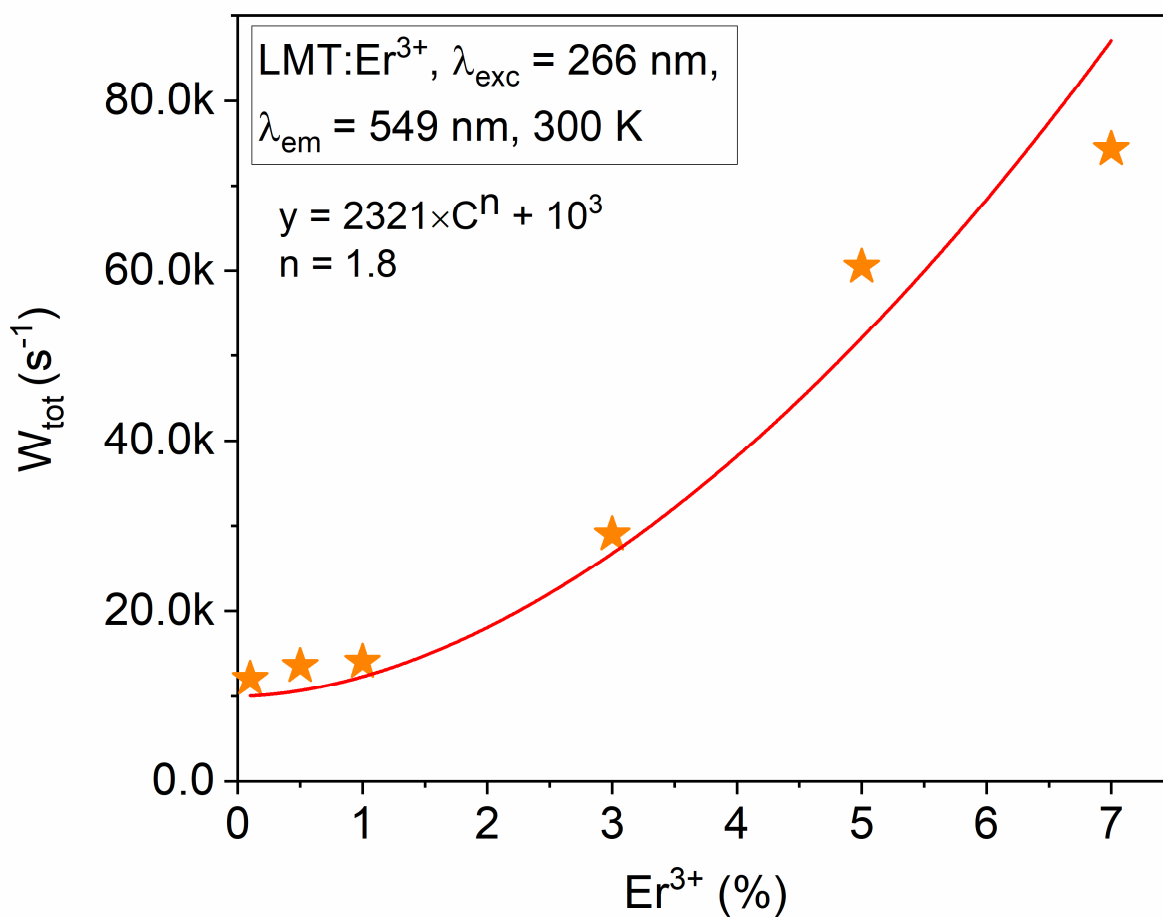

**Figure S7.** Energy transfer rates  $W_{\text{tot}} = aC^n$  at 300 K as a function of Er<sup>3+</sup> concentration.

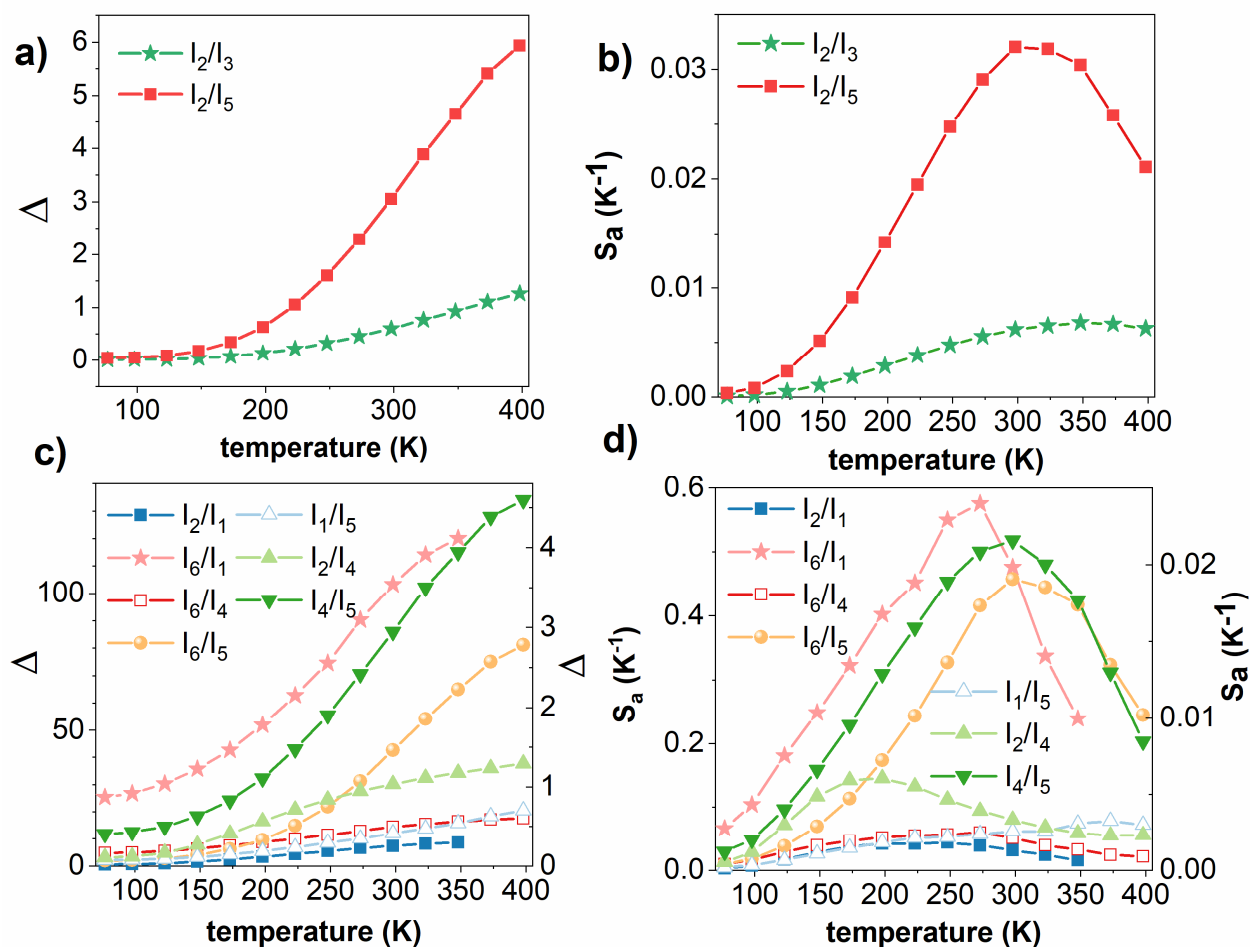

**Figure S8.** Thermometric parameters (a) and absolute sensitivities,  $S_a$  (K<sup>-1</sup>) (b) based on thermally coupled levels; Thermometric parameters (c) and absolute sensitivities,  $S_a$  (K<sup>-1</sup>) (d) based on thermally uncoupled levels.
